# Supplementary material
Source: PubMed Central journal article supplement (PMC3003071)
Supplement: 1013397107_pnas.201013397SI.pdf [file 1013397107_pnas.201013397SI.pdf]

# Supporting Information

Lam et al. 10.1073/pnas.1013397107

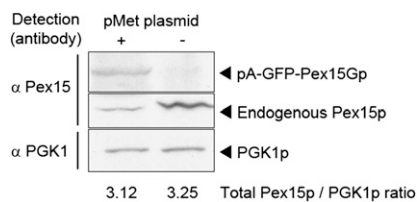

**Fig. S1.** Protein levels of N-terminal protein A (pA) and GFP extension of peroxisomal protein 15 (Pex15p) tagged at the C terminus with a short opsin tag containing one potential N-glycosylation site (pA-GFP-Pex15Gp) and endogenous Pex15p in *pex19Δ*-mutant cells. Total proteins were extracted from *pex19Δ*-mutant cells which carried either no plasmid or a centromere (CEN) plasmid expressing pA-GFP-Pex15Gp under control of a methionine-repressible promoter. The extracted proteins were analyzed by SDS/PAGE and immunoblotted with anti-Pex15p and anti-3-phosphoglycerate kinase (Pgk1p) antibodies. The signals of pA-GFP-Pex15Gp, endogenous Pex15p, and PGK1p were quantified by Typhoon and Image Quant Software (Molecular Dynamics). The total signal of pA-GFP-Pex15Gp plus endogenous Pex15p was divided by the PGK1p signal and represented as a total Pex15p/PGK1p ratio.
